# Supplementary material for: Connexin-43-dependent ATP release mediates macrophage activation during sepsis
Source: eLife journal article supplement (doi:10.7554/elife.42670), 2019-02-08
Supplement: supp [file elife-42670-supp-v1.zip]

Archive with 13 entries (13 files):
- elife_poa_e42670_Transparent_Reporting_File.pdf
- elife_poa_e42670_Figure_5_figure_supplement_1.ai
- elife_poa_e42670_Figure_1_figure_supplement_1.ai
- elife_poa_e42670_Figure_1_figure_supplement_2.ai
- elife_poa_e42670_Figure_5_figure_supplement_2.ai
- elife_poa_e42670_Figure_2_figure_supplement_1.ai
- elife_poa_e42670_Figure_4_figure_supplement_1.ai
- elife_poa_e42670_Figure_4_figure_supplement_2.ai
- elife_poa_e42670_Figure_4_figure_supplement_3.ai
- elife_poa_e42670_Figure_3_figure_supplement_1.ai
- elife_poa_e42670_Supplementary_File_1.docx
- elife_poa_e42670_Figure_5_figure_supplement_3.ai
- elife_poa_e42670_Source_data_1.pdf
