# Supplementary material for: Connexin-43-dependent ATP release mediates macrophage activation during sepsis
Source: eLife journal article supplement (doi:10.7554/elife.42670), 2019-02-08

Source data 1: Full uncut western blot membranes

Figure 2 E

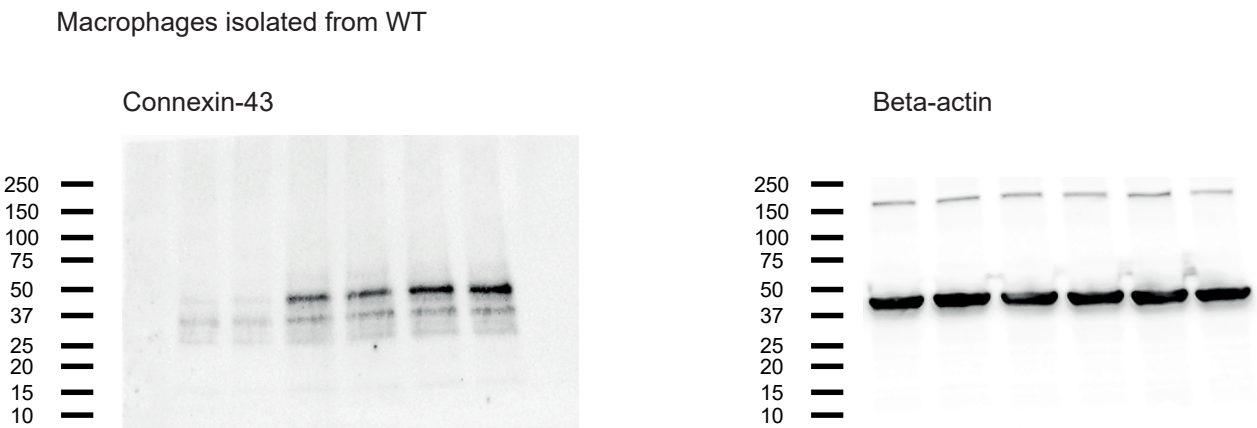

Figure 2 G

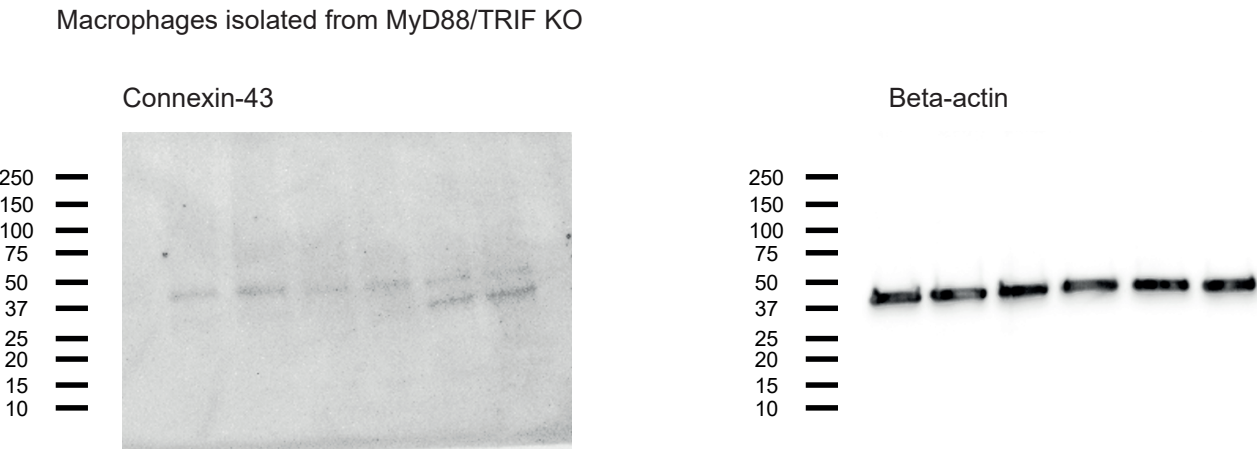

Figure 2 I

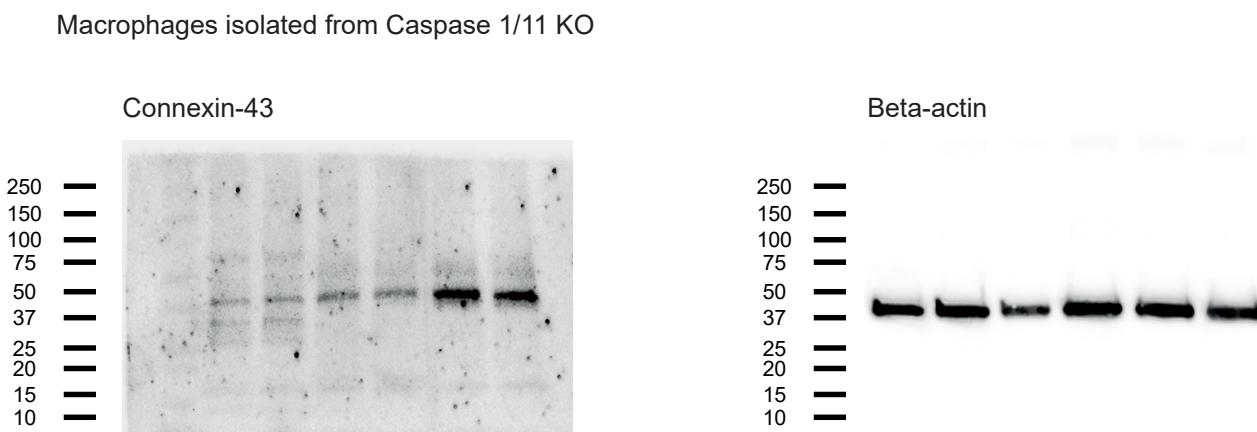

Figure 3 A

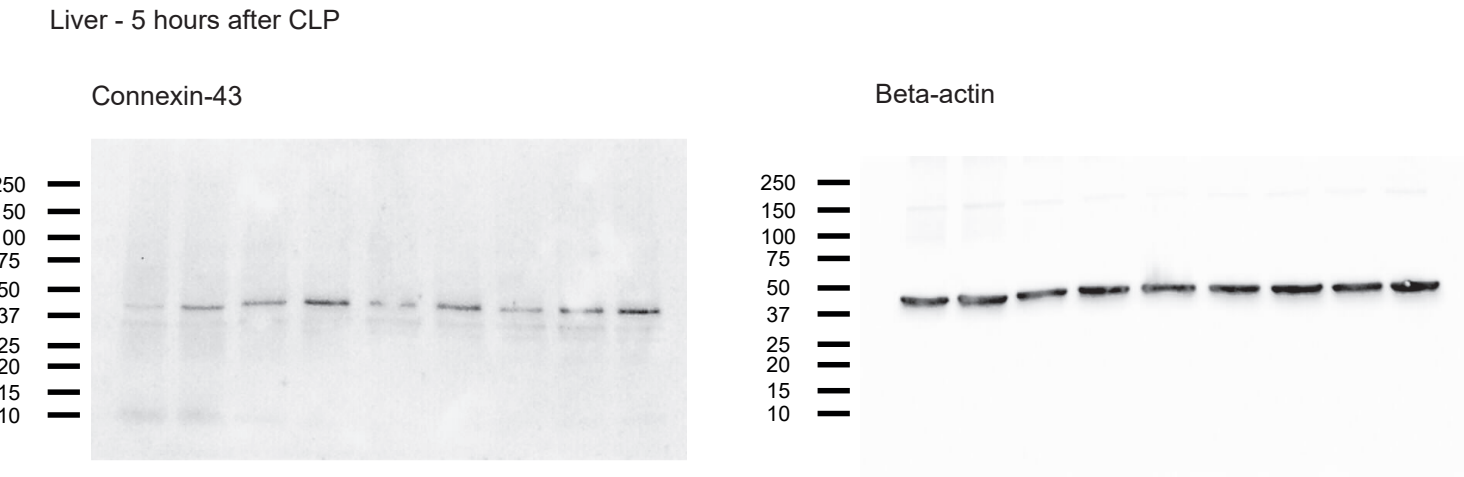

Figure 3 A

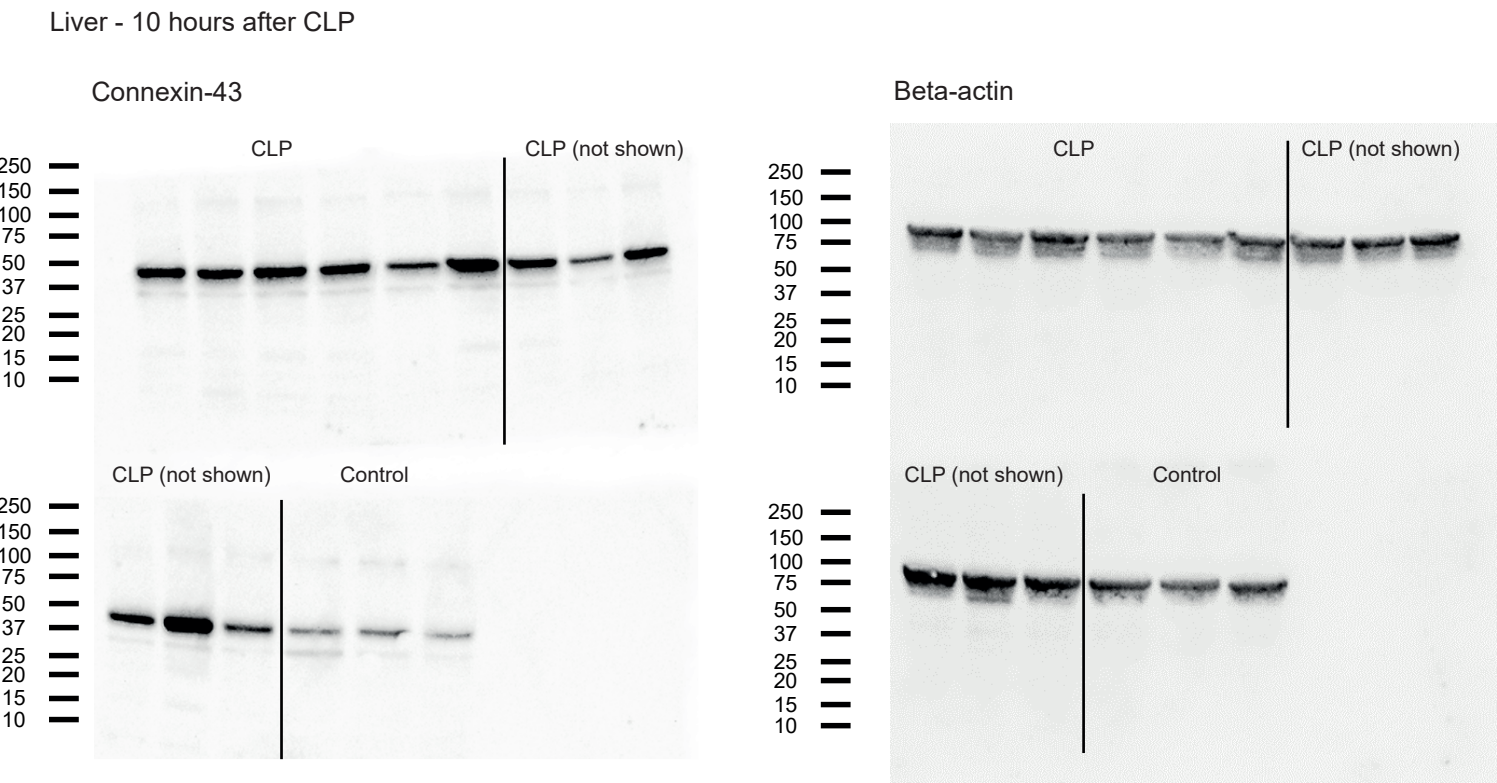

Figure 3 C

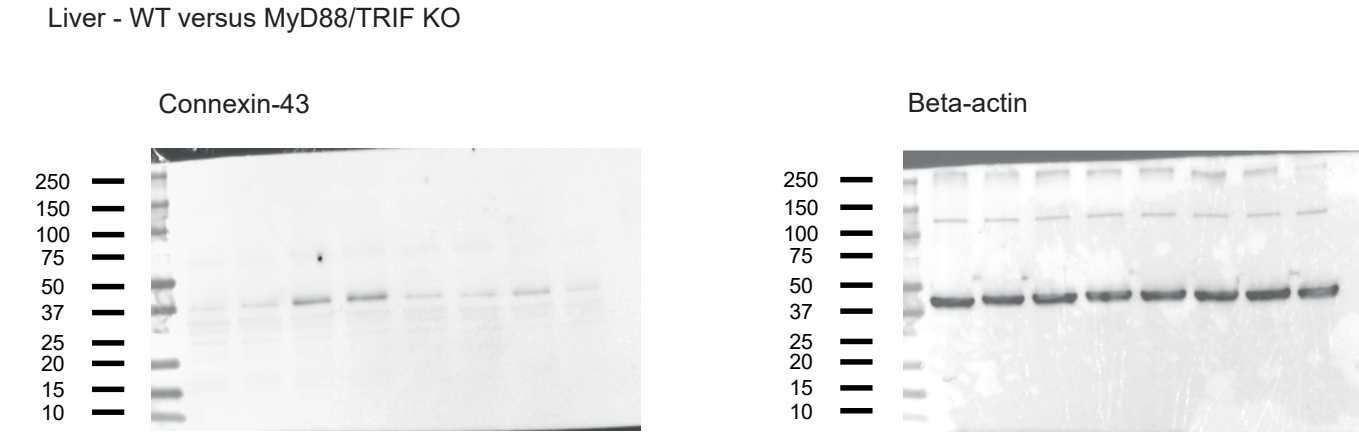

Figure 3 H

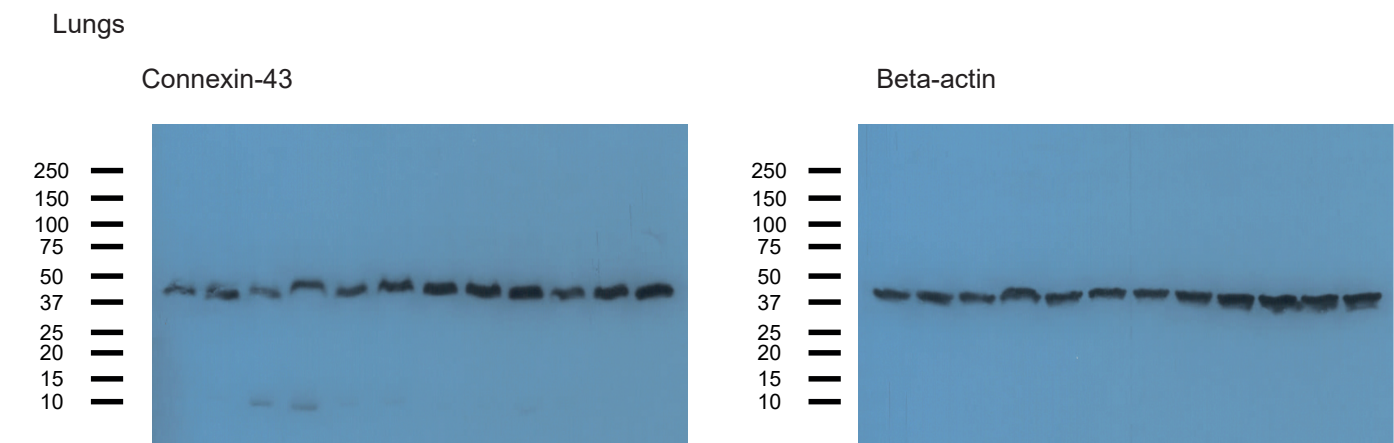

Supplemental Figure 2 C

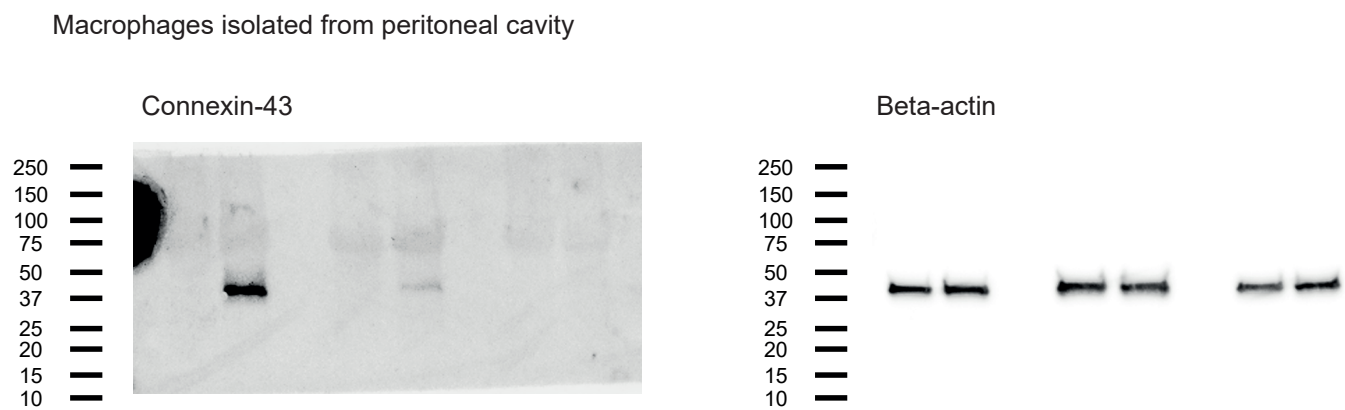

Supplemental Figure 2 D

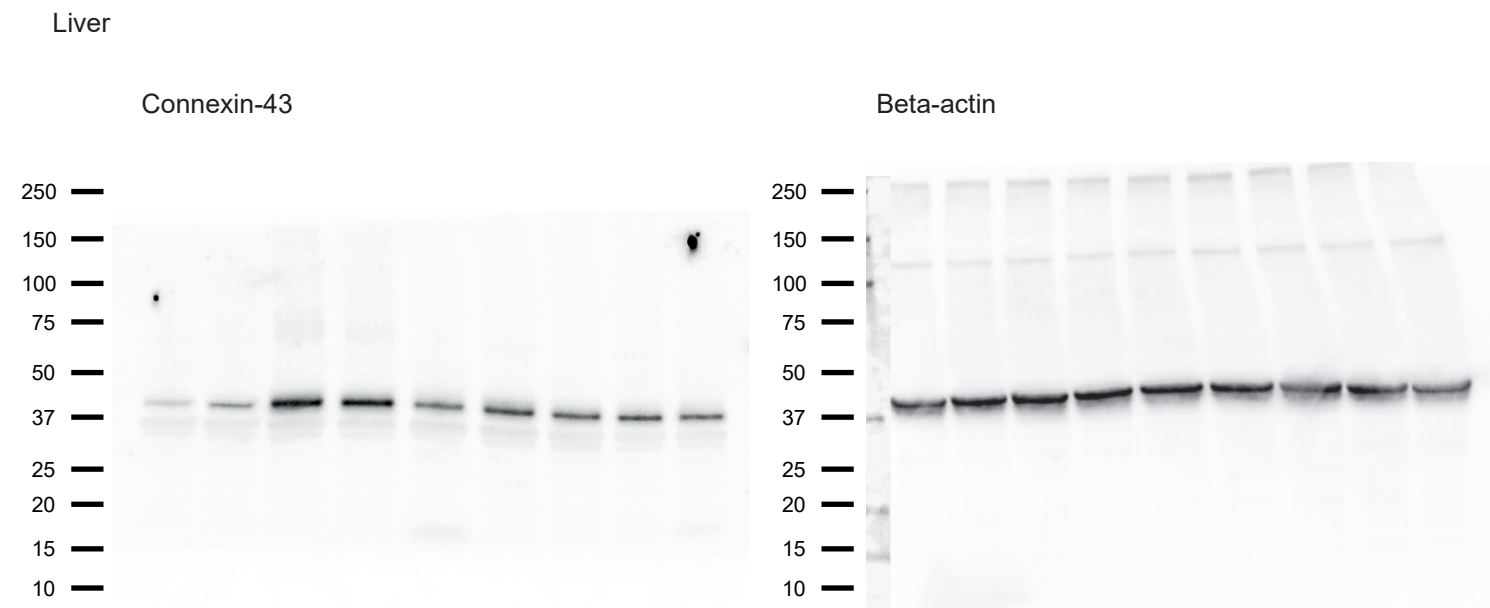

Supplement: supp [file elife-42670-supp-v1.zip › elife_poa_e42670_Source_data_1.pdf]
